# Supplementary material for: Antiviral Drug Candidate Repositioning for Streptococcus suis Infection in Non-Tumorigenic Cell Models
Source: MDPI journal article supplement (doi:10.3390/biomedicines12040783), 2024-04-02
Supplement: s1 [file s1]

## Supplementary material

MI-463

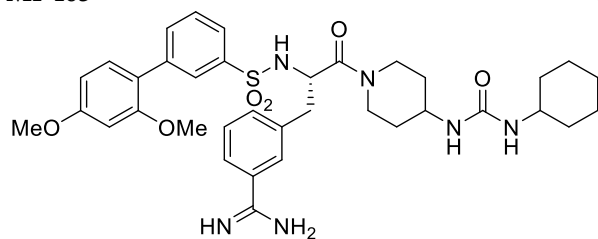

MI-472

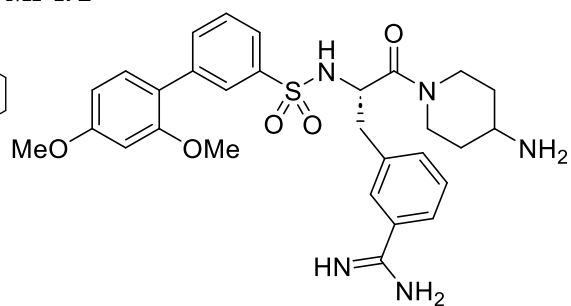

MI-477

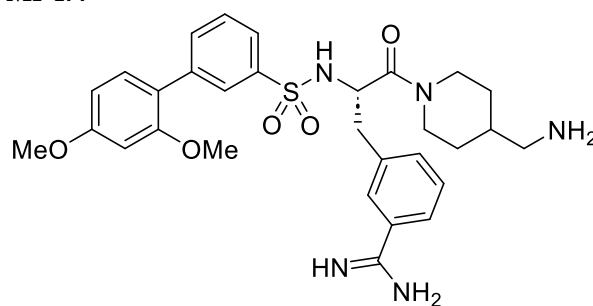

MI-485

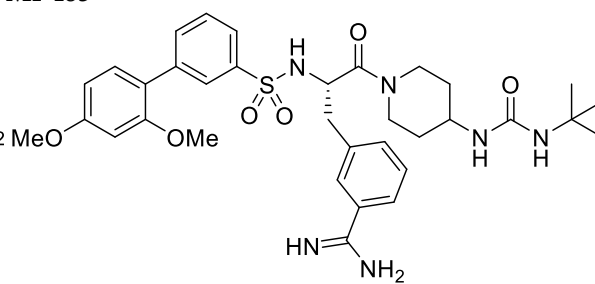

MI-490

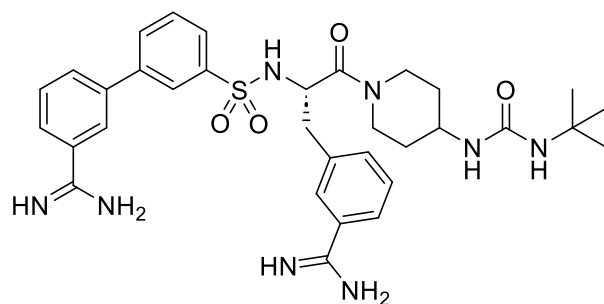

MI-1903

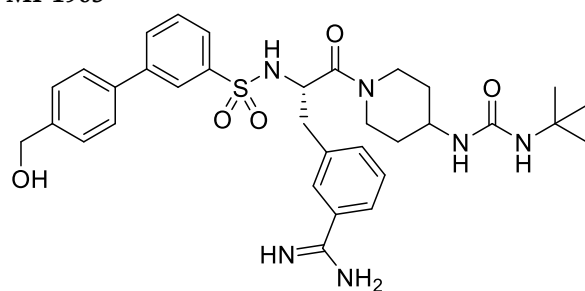

MI-1904

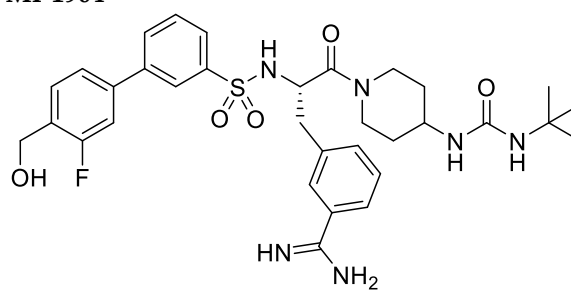

**Figure S1.** Matriptase/TMPRSS2 inhibitors applied in this study besides MI-432, MI-471 and MI-476 [32,56].
